# Supplementary material for: Wastewater surveillance of SARS-CoV-2 mutational profiles at a university and its surrounding community reveals a 20G outbreak on campus
Source: PubMed Central journal article supplement (PMC9009614; doi:10.1371/journal.pone.0266407), 2022-04-14

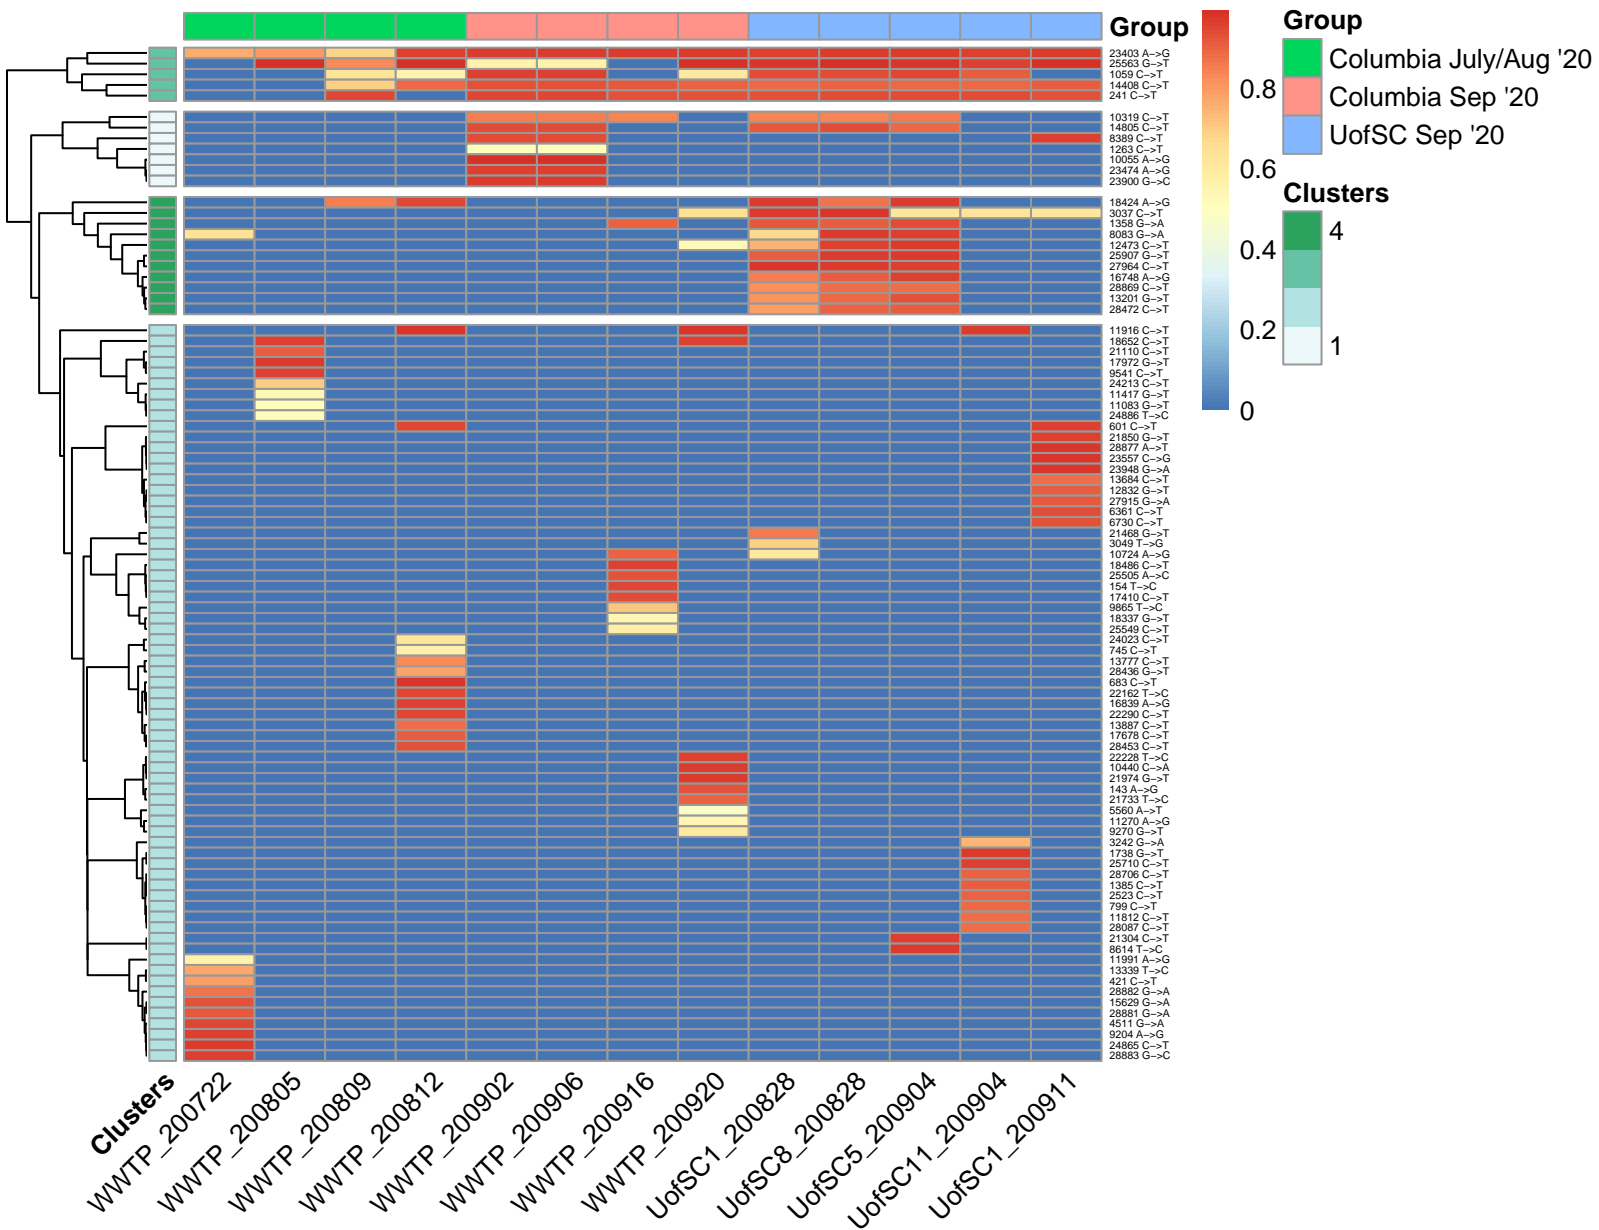

Supplement: pone.0266407.s006.pdf [file pone.0266407.s006.pdf]
